# Supplementary material
Source: publisher figshare collection journal article supplement (https://acs.figshare.com/ndownloader/files/4713211)
Supplement: Supplementary file 1 [file 4713211]

data_global

#============================================================================

# 1. SUBMISSION DETAILS

_publ_contact_author          # Name and address of author for correspondence

;     'Prof. S.V.Kessar'
      Department of Chemistry
      Panjab University
      Chandigarh 160 014
      India
;
_publ_contact_author_phone        '091 172 2541435'
_publ_contact_author_fax          '091 172 2545074'
_publ_contact_author_email        svkessar@pu.ac.in

_publ_requested_journal           'Journal of the American Chemical Society'
_publ_requested_coeditor_name     ?

_publ_contact_letter
;
 Please send back the CCDC code by e-mail
;
loop_
 _publ_author_name
 _publ_author_address
     'S.V.Kessar'
;     Department of Chemistry
      Panjab University
      Chandigarh 160 014
      India
     'Paramjit Singh'
;     Department of Chemistry
      Panjab University
      Chandigarh 160 014
      India

     'Kamal Nain Singh'
;     Department of Chemistry
      Panjab University
      Chandigarh 160 014
      India
     
     'P. Venugopalan'
;     Department of Chemistry
      Panjab University
      Chandigarh 160 014
      India

     'Amarjit Kaur'
;     Department of Chemistry
      Panjab University
      Chandigarh 160 014
      India
;
    'Prasad V. Bharatam'
;     Department of medicinal chemistry
      NIPER
      MOHALI 160 062
      India
;
    'Arvind K.Sharma'
;     Department of Chemistry
      Panjab University
      Chandigarh 160 014
      India
;
#============================================================================

#\#CIF_1.1
 
#  CIF produced by WinGX routine CIF_UPDATE
#  Created on 2006-08-25 at 10:50:58
#  Using CIFtbx version 2.6.2 16 Jun 1998
 
#  Dictionary name : cif_core.dic
#  Dictionary vers : 2.3
#  Request file    : c:\program files\wingx\files\archive.dat
#  CIF files read  : kamal4
 
 
data_kamal4
 
_audit_creation_date                    2006-08-25T10:50:58-00:00
_audit_creation_method                  'WinGX routine CIF_UPDATE'
_audit_conform_dict_name                cif_core.dic
_audit_conform_dict_version             2.3
_audit_conform_dict_location            ftp://ftp.iucr.org/pub/cif_core.dic
_publ_requested_category                FO
 
#----------------------------------------------------------------------------#
#                   CHEMICAL INFORMATION                                     #
#----------------------------------------------------------------------------#
 
_chemical_name_systematic
;
(octahydro-indolizin-3-yl)-diphenyl-methanol
;
_chemical_formula_sum                   'C21 H25 N O'
_chemical_formula_weight                307.42
_chemical_melting_point                 366
#----------------------------------------------------------------------------#
#                   UNIT CELL INFORMATION                                    #
#----------------------------------------------------------------------------#
_symmetry_cell_setting            Monoclinic
_symmetry_space_group_name_H-M    P2(1)/c
 
loop_
    _symmetry_equiv_pos_as_xyz
'x, y, z'
'-x, y+1/2, -z+1/2'
'-x, -y, -z'
'x, -y-1/2, z-1/2'
 
_cell_length_a                          8.0430(10)
_cell_length_b                          8.2140(10)
_cell_length_c                          26.677(2)
_cell_angle_alpha                       90
_cell_angle_beta                        91.050(10)
_cell_angle_gamma                       90
_cell_volume                            1762.1(3)
_cell_formula_units_Z                   4
_cell_measurement_temperature           293(2)
_cell_measurement_reflns_used           40
_cell_measurement_theta_min             10.355
_cell_measurement_theta_max             25.243
 
#----------------------------------------------------------------------------#
#                   CRYSTAL INFORMATION                                      #
#----------------------------------------------------------------------------#
_exptl_crystal_description              block
_exptl_crystal_colour                   colorless
_exptl_crystal_preparation              'ethyl actate-hexanes (1:1, V/V)'
_exptl_crystal_size_max                 0.27
_exptl_crystal_size_mid                 0.25
_exptl_crystal_size_min                 0.15
_exptl_crystal_density_meas             ?
_exptl_crystal_density_diffrn           1.159
_exptl_crystal_density_method           'not measured'
_exptl_crystal_F_000                    664
_exptl_special_details
;
 ?
;
 
#----------------------------------------------------------------------------#
#                   ABSORPTION CORRECTION                                    #
#----------------------------------------------------------------------------#
 
_exptl_absorpt_coefficient_mu           0.07
_exptl_absorpt_correction_type          none
 
#----------------------------------------------------------------------------#
#                   DATA COLLECTION                                          #
#----------------------------------------------------------------------------#
 
_diffrn_ambient_temperature             293(2)
_diffrn_radiation_wavelength            0.71073
_diffrn_radiation_type                  MoK\a
_diffrn_radiation_monochromator         graphite
_diffrn_measurement_device_type         'Siemens P4'
_diffrn_measurement_method              '2\q/\w scans'
_diffrn_radiation_source                'sealed tube'
_diffrn_reflns_av_R_equivalents         0.0179
_diffrn_reflns_av_unetI/netI            0.0278
_diffrn_standards_number          	3 
_diffrn_standards_interval_count  	97 
_diffrn_standards_interval_time   	? 
_diffrn_standards_decay_%         	none 
_diffrn_reflns_number                   2990
_diffrn_reflns_limit_h_min              0
_diffrn_reflns_limit_h_max              9
_diffrn_reflns_limit_k_min              0
_diffrn_reflns_limit_k_max              9
_diffrn_reflns_limit_l_min              -30
_diffrn_reflns_limit_l_max              30
_diffrn_reflns_theta_min                2.53
_diffrn_reflns_theta_max                24
_diffrn_reflns_theta_full               24
_diffrn_measured_fraction_theta_full
                                        0.999
_diffrn_measured_fraction_theta_max
                                        0.999
_reflns_number_total                    2763
_reflns_number_gt                       2200
_reflns_threshold_expression            >2sigma(I)
 
#----------------------------------------------------------------------------#
#                   COMPUTER PROGRAMS USED                                   #
#----------------------------------------------------------------------------#
_computing_data_collection        'XSCANS (Siemens)' 
_computing_cell_refinement        'XSCANS (Siemens)' 
_computing_data_reduction         'XSCANS (Siemens)' 
_computing_structure_solution     'SHELXS-97 (Sheldrick, 1997)' 
_computing_structure_refinement   'SHELXL-97 (Sheldrick, 1997)' 
_computing_molecular_graphics     'XP (Siemens)' 
_computing_publication_material   'SHELXL-97' 
#----------------------------------------------------------------------------#
#                   REFINEMENT INFORMATION                                   #
#----------------------------------------------------------------------------#
 
_refine_special_details
;
 Refinement of F^2^ against ALL reflections.  The weighted R-factor wR and
 goodness of fit S are based on F^2^, conventional R-factors R are based
 on F, with F set to zero for negative F^2^. The threshold expression of
 F^2^ > 2sigma(F^2^) is used only for calculating R-factors(gt) etc. and is
 not relevant to the choice of reflections for refinement.  R-factors based
 on F^2^ are statistically about twice as large as those based on F, and R-
 factors based on ALL data will be even larger.
;
_refine_ls_structure_factor_coef        Fsqd
_refine_ls_matrix_type                  full
_refine_ls_weighting_scheme             calc
_refine_ls_weighting_details
         'calc w=1/[\s^2^(Fo^2^)+(0.0449P)^2^+0.3713P] where P=(Fo^2^+2Fc^2^)/3'
_atom_sites_solution_primary            direct
_atom_sites_solution_secondary          difmap
_atom_sites_solution_hydrogens          geom
_refine_ls_hydrogen_treatment           constr
_refine_ls_extinction_method            SHELXL
_refine_ls_extinction_expression
                                    Fc^*^=kFc[1+0.001xFc^2^\l^3^/sin(2\q)]^-1/4^
_refine_ls_extinction_coef              0.0163(14)
_refine_ls_number_reflns                2763
_refine_ls_number_parameters            210
_refine_ls_number_restraints            0
_refine_ls_R_factor_all                 0.0526
_refine_ls_R_factor_gt                  0.0393
_refine_ls_wR_factor_ref                0.1062
_refine_ls_wR_factor_gt                 0.0978
_refine_ls_goodness_of_fit_ref          1.01
_refine_ls_restrained_S_all             1.01
_refine_ls_shift/su_max                 0
_refine_ls_shift/su_mean                0
_refine_diff_density_max                0.113
_refine_diff_density_min                -0.123
_refine_diff_density_rms                0.027
 
#----------------------------------------------------------------------------#
#                   ATOMIC TYPES, COORDINATES AND THERMAL PARAMETERS         #
#----------------------------------------------------------------------------#
 
loop_
    _atom_type_symbol
    _atom_type_description
    _atom_type_scat_dispersion_real
    _atom_type_scat_dispersion_imag
    _atom_type_scat_source
C C 0.0033 0.0016 'International Tables Vol C Tables 4.2.6.8 and 6.1.1.4'
H H 0 0 'International Tables Vol C Tables 4.2.6.8 and 6.1.1.4'
N N 0.0061 0.0033 'International Tables Vol C Tables 4.2.6.8 and 6.1.1.4'
O O 0.0106 0.006 'International Tables Vol C Tables 4.2.6.8 and 6.1.1.4'
 
loop_
    _atom_site_label
    _atom_site_type_symbol
    _atom_site_fract_x
    _atom_site_fract_y
    _atom_site_fract_z
    _atom_site_U_iso_or_equiv
    _atom_site_adp_type
    _atom_site_occupancy
    _atom_site_symmetry_multiplicity
    _atom_site_calc_flag
    _atom_site_refinement_flags
    _atom_site_disorder_assembly
    _atom_site_disorder_group
O1 O 0.27876(14) -0.00556(13) 0.11021(4) 0.0537(3) Uani 1 1 d . . .
H1A H 0.3352 -0.0171 0.0852 0.081 Uiso 1 1 calc R . .
N1 N 0.58249(16) -0.13439(17) 0.09495(5) 0.0523(4) Uani 1 1 d . . .
C1 C 0.6148(2) -0.3009(2) 0.07801(7) 0.0637(5) Uani 1 1 d . . .
H1B H 0.5197 -0.3695 0.0848 0.076 Uiso 1 1 calc R . .
H1C H 0.7107 -0.3449 0.0959 0.076 Uiso 1 1 calc R . .
C2 C 0.6470(2) -0.2990(3) 0.02214(7) 0.0730(6) Uani 1 1 d . . .
H2A H 0.5464 -0.2662 0.0043 0.088 Uiso 1 1 calc R . .
H2B H 0.6753 -0.408 0.0113 0.088 Uiso 1 1 calc R . .
C3 C 0.7873(3) -0.1832(3) 0.00897(7) 0.0751(6) Uani 1 1 d . . .
H3A H 0.8922 -0.2279 0.0211 0.09 Uiso 1 1 calc R . .
H3B H 0.7927 -0.1729 -0.0272 0.09 Uiso 1 1 calc R . .
C4 C 0.7619(3) -0.0167(3) 0.03186(8) 0.0760(6) Uani 1 1 d . . .
H4A H 0.6686 0.0368 0.0152 0.091 Uiso 1 1 calc R . .
H4B H 0.8602 0.0493 0.0269 0.091 Uiso 1 1 calc R . .
C5 C 0.7287(2) -0.0308(2) 0.08750(7) 0.0600(5) Uani 1 1 d . . .
H5A H 0.8252 -0.0819 0.104 0.072 Uiso 1 1 calc R . .
C6 C 0.6844(3) 0.1207(2) 0.11595(8) 0.0736(6) Uani 1 1 d . . .
H6A H 0.6074 0.1881 0.0967 0.088 Uiso 1 1 calc R . .
H6B H 0.7827 0.1839 0.1244 0.088 Uiso 1 1 calc R . .
C7 C 0.6035(2) 0.0541(2) 0.16269(7) 0.0678(5) Uani 1 1 d . . .
H7A H 0.517 0.1271 0.1739 0.081 Uiso 1 1 calc R . .
H7B H 0.6854 0.0409 0.1895 0.081 Uiso 1 1 calc R . .
C8 C 0.52905(19) -0.1123(2) 0.14725(6) 0.0491(4) Uani 1 1 d . . .
H8A H 0.5751 -0.1989 0.1686 0.059 Uiso 1 1 calc R . .
C9 C 0.33531(19) -0.11509(18) 0.14830(5) 0.0439(4) Uani 1 1 d . . .
C10 C 0.26819(18) -0.28694(19) 0.13763(6) 0.0448(4) Uani 1 1 d . . .
C11 C 0.3039(2) -0.4147(2) 0.17000(6) 0.0535(4) Uani 1 1 d . . .
H11A H 0.3648 -0.3946 0.1993 0.064 Uiso 1 1 calc R . .
C12 C 0.2512(2) -0.5711(2) 0.15965(8) 0.0647(5) Uani 1 1 d . . .
H12A H 0.278 -0.6554 0.1816 0.078 Uiso 1 1 calc R . .
C13 C 0.1591(3) -0.6024(2) 0.11680(8) 0.0713(6) Uani 1 1 d . . .
H13A H 0.1242 -0.7078 0.1095 0.086 Uiso 1 1 calc R . .
C14 C 0.1190(3) -0.4771(2) 0.08497(8) 0.0708(5) Uani 1 1 d . . .
H14A H 0.0552 -0.4975 0.0562 0.085 Uiso 1 1 calc R . .
C15 C 0.1725(2) -0.3200(2) 0.09522(6) 0.0575(5) Uani 1 1 d . . .
H15A H 0.1438 -0.2359 0.0734 0.069 Uiso 1 1 calc R . .
C16 C 0.26634(18) -0.05495(18) 0.19787(6) 0.0441(4) Uani 1 1 d . . .
C17 C 0.1167(2) 0.0288(2) 0.19811(6) 0.0539(4) Uani 1 1 d . . .
H17A H 0.0594 0.047 0.168 0.065 Uiso 1 1 calc R . .
C18 C 0.0513(2) 0.0857(2) 0.24235(7) 0.0656(5) Uani 1 1 d . . .
H18A H -0.0482 0.1434 0.2417 0.079 Uiso 1 1 calc R . .
C19 C 0.1318(2) 0.0579(2) 0.28717(7) 0.0648(5) Uani 1 1 d . . .
H19A H 0.0878 0.0967 0.3169 0.078 Uiso 1 1 calc R . .
C20 C 0.2785(2) -0.0281(2) 0.28788(7) 0.0617(5) Uani 1 1 d . . .
H20A H 0.3328 -0.0492 0.3183 0.074 Uiso 1 1 calc R . .
C21 C 0.3458(2) -0.0835(2) 0.24371(6) 0.0546(4) Uani 1 1 d . . .
H21A H 0.4457 -0.1406 0.2447 0.065 Uiso 1 1 calc R . .
 
loop_
    _atom_site_aniso_label
    _atom_site_aniso_U_11
    _atom_site_aniso_U_22
    _atom_site_aniso_U_33
    _atom_site_aniso_U_23
    _atom_site_aniso_U_13
    _atom_site_aniso_U_12
O1 0.0611(7) 0.0507(7) 0.0495(7) 0.0102(5) 0.0077(5) 0.0081(5)
N1 0.0472(8) 0.0573(9) 0.0528(8) -0.0034(6) 0.0122(6) -0.0016(6)
C1 0.0596(11) 0.0631(12) 0.0691(11) -0.0098(9) 0.0175(9) 0.0025(9)
C2 0.0654(12) 0.0892(14) 0.0647(12) -0.0161(10) 0.0102(9) 0.0113(11)
C3 0.0712(12) 0.0981(16) 0.0565(11) 0.0049(11) 0.0170(9) 0.0157(12)
C4 0.0708(13) 0.0876(15) 0.0703(13) 0.0137(11) 0.0233(10) -0.0014(11)
C5 0.0477(10) 0.0691(12) 0.0636(11) 0.0030(9) 0.0129(8) -0.0061(9)
C6 0.0649(12) 0.0680(12) 0.0885(14) -0.0076(11) 0.0210(10) -0.0191(10)
C7 0.0583(11) 0.0742(13) 0.0715(12) -0.0170(10) 0.0150(9) -0.0178(9)
C8 0.0448(9) 0.0529(10) 0.0499(9) -0.0021(7) 0.0072(7) -0.0003(7)
C9 0.0431(8) 0.0432(8) 0.0456(8) 0.0050(7) 0.0039(7) 0.0022(7)
C10 0.0385(8) 0.0460(9) 0.0501(9) -0.0002(7) 0.0087(7) 0.0048(7)
C11 0.0499(9) 0.0507(10) 0.0600(10) 0.0048(8) 0.0052(8) 0.0025(8)
C12 0.0652(12) 0.0456(10) 0.0837(13) 0.0062(9) 0.0127(10) 0.0037(9)
C13 0.0778(13) 0.0476(11) 0.0889(14) -0.0156(10) 0.0177(11) -0.0060(10)
C14 0.0768(13) 0.0677(13) 0.0676(12) -0.0196(10) -0.0016(10) -0.0055(10)
C15 0.0623(10) 0.0534(11) 0.0566(10) -0.0049(8) -0.0021(8) 0.0038(9)
C16 0.0429(8) 0.0393(8) 0.0502(9) 0.0012(7) 0.0073(7) -0.0037(7)
C17 0.0457(9) 0.0579(10) 0.0584(10) 0.0019(8) 0.0058(8) 0.0031(8)
C18 0.0495(10) 0.0753(13) 0.0726(12) -0.0073(10) 0.0156(9) 0.0080(9)
C19 0.0599(11) 0.0737(12) 0.0615(11) -0.0155(10) 0.0208(9) -0.0094(10)
C20 0.0609(11) 0.0747(12) 0.0496(10) -0.0043(9) 0.0053(8) -0.0089(10)
C21 0.0499(9) 0.0611(11) 0.0527(10) -0.0006(8) 0.0042(8) 0.0035(8)
 
 
#----------------------------------------------------------------------------#
#                   MOLECULAR GEOMETRY                                       #
#----------------------------------------------------------------------------#
 
_geom_special_details
;
 All esds (except the esd in the dihedral angle between two l.s. planes)
 are estimated using the full covariance matrix.  The cell esds are taken
 into account individually in the estimation of esds in distances, angles
 and torsion angles; correlations between esds in cell parameters are only
 used when they are defined by crystal symmetry.  An approximate (isotropic)
 treatment of cell esds is used for estimating esds involving l.s. planes.
;
loop_
    _geom_bond_atom_site_label_1
    _geom_bond_atom_site_label_2
    _geom_bond_distance
    _geom_bond_site_symmetry_2
    _geom_bond_publ_flag
O1 C9 1.4255(18) . ?
N1 C1 1.465(2) . ?
N1 C5 1.468(2) . ?
N1 C8 1.479(2) . ?
C1 C2 1.517(2) . ?
C2 C3 1.521(3) . ?
C3 C4 1.513(3) . ?
C4 C5 1.517(3) . ?
C5 C6 1.503(3) . ?
C6 C7 1.519(3) . ?
C7 C8 1.545(2) . ?
C8 C9 1.559(2) . ?
C9 C16 1.526(2) . ?
C9 C10 1.536(2) . ?
C10 C15 1.383(2) . ?
C10 C11 1.386(2) . ?
C11 C12 1.379(2) . ?
C12 C13 1.375(3) . ?
C13 C14 1.369(3) . ?
C14 C15 1.386(3) . ?
C16 C17 1.387(2) . ?
C16 C21 1.389(2) . ?
C17 C18 1.382(2) . ?
C18 C19 1.369(3) . ?
C19 C20 1.375(3) . ?
C20 C21 1.383(2) . ?
 
loop_
    _geom_angle_atom_site_label_1
    _geom_angle_atom_site_label_2
    _geom_angle_atom_site_label_3
    _geom_angle
    _geom_angle_site_symmetry_1
    _geom_angle_site_symmetry_3
    _geom_angle_publ_flag
C1 N1 C5 110.63(13) . . ?
C1 N1 C8 117.51(13) . . ?
C5 N1 C8 107.69(13) . . ?
N1 C1 C2 109.13(16) . . ?
C1 C2 C3 111.96(16) . . ?
C4 C3 C2 111.43(16) . . ?
C3 C4 C5 110.70(16) . . ?
N1 C5 C6 102.31(13) . . ?
N1 C5 C4 109.40(15) . . ?
C6 C5 C4 118.58(17) . . ?
C5 C6 C7 103.06(15) . . ?
C6 C7 C8 105.61(14) . . ?
N1 C8 C7 104.01(13) . . ?
N1 C8 C9 108.85(12) . . ?
C7 C8 C9 113.02(14) . . ?
O1 C9 C16 107.29(12) . . ?
O1 C9 C10 109.96(12) . . ?
C16 C9 C10 109.03(12) . . ?
O1 C9 C8 106.48(12) . . ?
C16 C9 C8 112.97(12) . . ?
C10 C9 C8 110.99(12) . . ?
C15 C10 C11 117.83(15) . . ?
C15 C10 C9 121.35(14) . . ?
C11 C10 C9 120.82(14) . . ?
C12 C11 C10 121.41(17) . . ?
C13 C12 C11 119.95(18) . . ?
C14 C13 C12 119.52(18) . . ?
C13 C14 C15 120.57(18) . . ?
C10 C15 C14 120.69(17) . . ?
C17 C16 C21 117.72(14) . . ?
C17 C16 C9 119.61(14) . . ?
C21 C16 C9 122.65(14) . . ?
C18 C17 C16 121.04(16) . . ?
C19 C18 C17 120.53(17) . . ?
C18 C19 C20 119.36(16) . . ?
C19 C20 C21 120.42(17) . . ?
C20 C21 C16 120.90(16) . . ?
 
loop_
    _geom_torsion_atom_site_label_1
    _geom_torsion_atom_site_label_2
    _geom_torsion_atom_site_label_3
    _geom_torsion_atom_site_label_4
    _geom_torsion
    _geom_torsion_site_symmetry_1
    _geom_torsion_site_symmetry_2
    _geom_torsion_site_symmetry_3
    _geom_torsion_site_symmetry_4
    _geom_torsion_publ_flag
C5 N1 C1 C2 -62.66(19) . . . . ?
C8 N1 C1 C2 173.13(14) . . . . ?
N1 C1 C2 C3 55.3(2) . . . . ?
C1 C2 C3 C4 -50.4(2) . . . . ?
C2 C3 C4 C5 51.1(2) . . . . ?
C1 N1 C5 C6 -169.14(15) . . . . ?
C8 N1 C5 C6 -39.48(18) . . . . ?
C1 N1 C5 C4 64.28(19) . . . . ?
C8 N1 C5 C4 -166.06(15) . . . . ?
C3 C4 C5 N1 -57.6(2) . . . . ?
C3 C4 C5 C6 -174.34(17) . . . . ?
N1 C5 C6 C7 40.49(19) . . . . ?
C4 C5 C6 C7 160.89(17) . . . . ?
C5 C6 C7 C8 -27.4(2) . . . . ?
C1 N1 C8 C7 147.53(15) . . . . ?
C5 N1 C8 C7 21.85(17) . . . . ?
C1 N1 C8 C9 -91.74(17) . . . . ?
C5 N1 C8 C9 142.59(14) . . . . ?
C6 C7 C8 N1 4.08(19) . . . . ?
C6 C7 C8 C9 -113.81(16) . . . . ?
N1 C8 C9 O1 -49.25(16) . . . . ?
C7 C8 C9 O1 65.78(16) . . . . ?
N1 C8 C9 C16 -166.77(12) . . . . ?
C7 C8 C9 C16 -51.74(17) . . . . ?
N1 C8 C9 C10 70.42(16) . . . . ?
C7 C8 C9 C10 -174.56(13) . . . . ?
O1 C9 C10 C15 2.08(19) . . . . ?
C16 C9 C10 C15 119.46(16) . . . . ?
C8 C9 C10 C15 -115.48(16) . . . . ?
O1 C9 C10 C11 -178.88(13) . . . . ?
C16 C9 C10 C11 -61.50(18) . . . . ?
C8 C9 C10 C11 63.56(18) . . . . ?
C15 C10 C11 C12 2.2(2) . . . . ?
C9 C10 C11 C12 -176.83(15) . . . . ?
C10 C11 C12 C13 -1.0(3) . . . . ?
C11 C12 C13 C14 -0.6(3) . . . . ?
C12 C13 C14 C15 1.0(3) . . . . ?
C11 C10 C15 C14 -1.9(2) . . . . ?
C9 C10 C15 C14 177.14(16) . . . . ?
C13 C14 C15 C10 0.4(3) . . . . ?
O1 C9 C16 C17 29.51(19) . . . . ?
C10 C9 C16 C17 -89.54(17) . . . . ?
C8 C9 C16 C17 146.56(15) . . . . ?
O1 C9 C16 C21 -151.91(15) . . . . ?
C10 C9 C16 C21 89.03(17) . . . . ?
C8 C9 C16 C21 -34.9(2) . . . . ?
C21 C16 C17 C18 1.7(2) . . . . ?
C9 C16 C17 C18 -179.61(15) . . . . ?
C16 C17 C18 C19 -1.2(3) . . . . ?
C17 C18 C19 C20 -0.3(3) . . . . ?
C18 C19 C20 C21 1.2(3) . . . . ?
C19 C20 C21 C16 -0.6(3) . . . . ?
C17 C16 C21 C20 -0.8(2) . . . . ?
C9 C16 C21 C20 -179.44(15) . . . . ?
 
